# Supplementary material for: Combinatorial effect of nano whitlockite/nano bioglass with FGF-18 in an injectable hydrogel for craniofacial bone regeneration
Source: Royal Society of Chemistry journal article supplement (doi:10.1039/d0bm01496f), 2020-12-26
Supplement: d0bm01496f1.pdf [file d0bm01496f1.pdf]

**Supplementary Information**

**Combinatorial effect of nano whitlockite/nano bioglass with FGF-18 in an injectable hydrogel for craniofacial bone regeneration**

**Sivashanmugam Amirthalingam<sup>1</sup>, Seunghun S. Lee<sup>2</sup>, Mahalakshmi Pandian<sup>1</sup>,  
Janarthanan Ramu<sup>3</sup>, Subramania Iyer<sup>3</sup>, Nathaniel S. Hwang<sup>2,4\*</sup>, Jayakumar  
Rangasamy<sup>1\*</sup>**

<sup>1</sup>Centre for Nanosciences and Molecular Medicine, Amrita Vishwa Vidyapeetham, Kochi-682041, India

<sup>2</sup>School of Chemical and Biological Engineering, the Institute of Chemical Processes, Seoul National University, Seoul, 151-742, Republic of Korea

<sup>3</sup>Department of Plastic and Reconstructive Surgery, Amrita Institute of Medical Sciences and Research Centre, Amrita Vishwa Vidyapeetham, Kochi 682041, India

<sup>4</sup> BioMAX/N-Bio Institute and Institute of BioEngineering, Seoul National University, Seoul, Republic of Korea

---

\*Corresponding Author

E-mail: [rjayakumar@aims.amrita.edu](mailto:rjayakumar@aims.amrita.edu) (Dr. R.Jayakumar)

Tel: +91-484-2801234. Fax: +91-484-2802020

E-mail: [nshwang@snu.ac.kr](mailto:nshwang@snu.ac.kr) (Dr. Nathaniel S. Hwang)

Tel: +82-02-880-1635.

| Gene   | Forward                           | Reverse                           |
|--------|-----------------------------------|-----------------------------------|
| 18s    | 5'CGC TCT CTG CTC CTC CTG TT3'    | 5'CCA TGG TGT CTG AGC GAT GT3'    |
| RUNX2  | 5'ACT GGG CCC TTT TTC AGA3'       | 5'GCG GAA GCA TTC TGG AA3'        |
| ALP    | 5'ACG TGG CTA AGA ATG TCA TC3'    | 5'CTG GTA GGC GAT GTC CTT A3'     |
| Col IA | 5'GTC ACC CAC CGA CCA AGA AAC C3' | 5'AAG TCC AGG CTG TCC AGG GAT G3' |
| OCN    | 5'GCC TTT GTG TCC AAG C3'         | 5'GGA CCC CAC ATC CAT AG3'        |

**Table S1:** Primer sequences for RT-PCR study<sup>1,2</sup>.

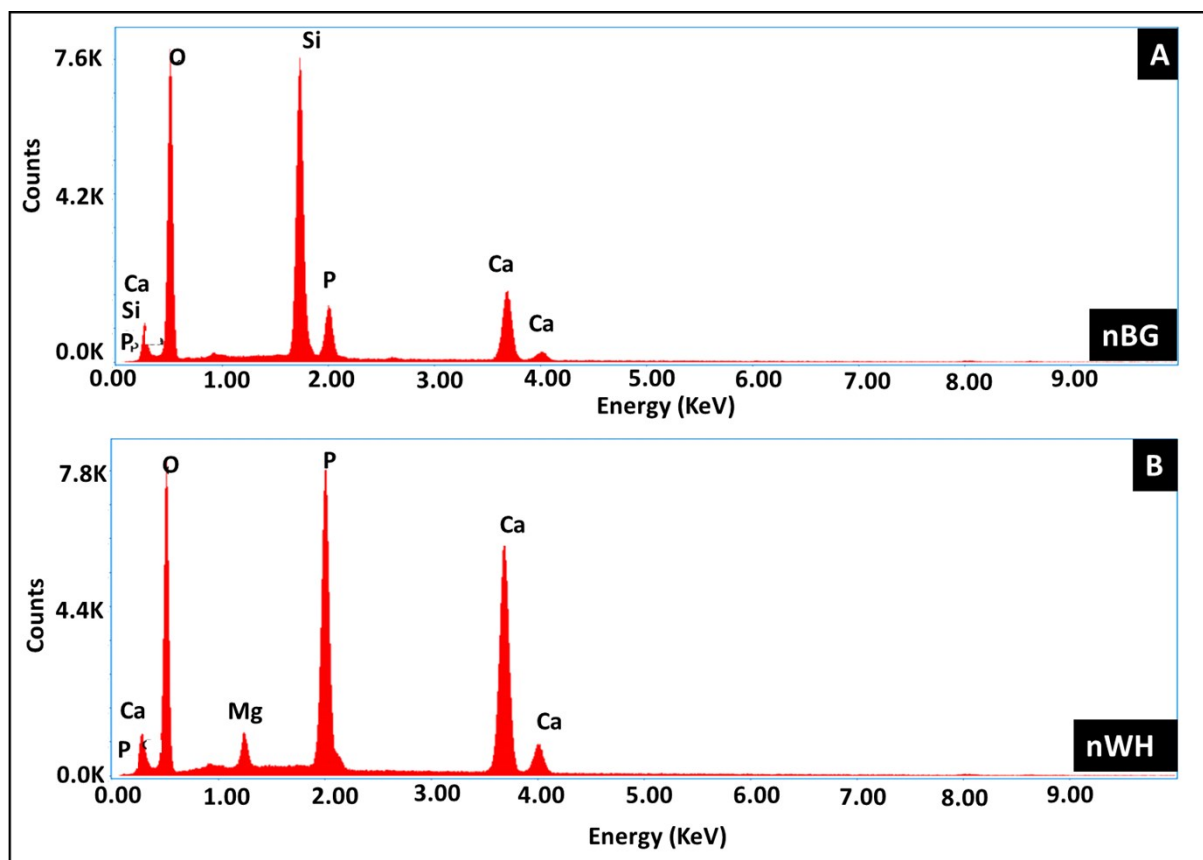

**Figure S1:** Elemental composition of nBG (A) and nWH (B).

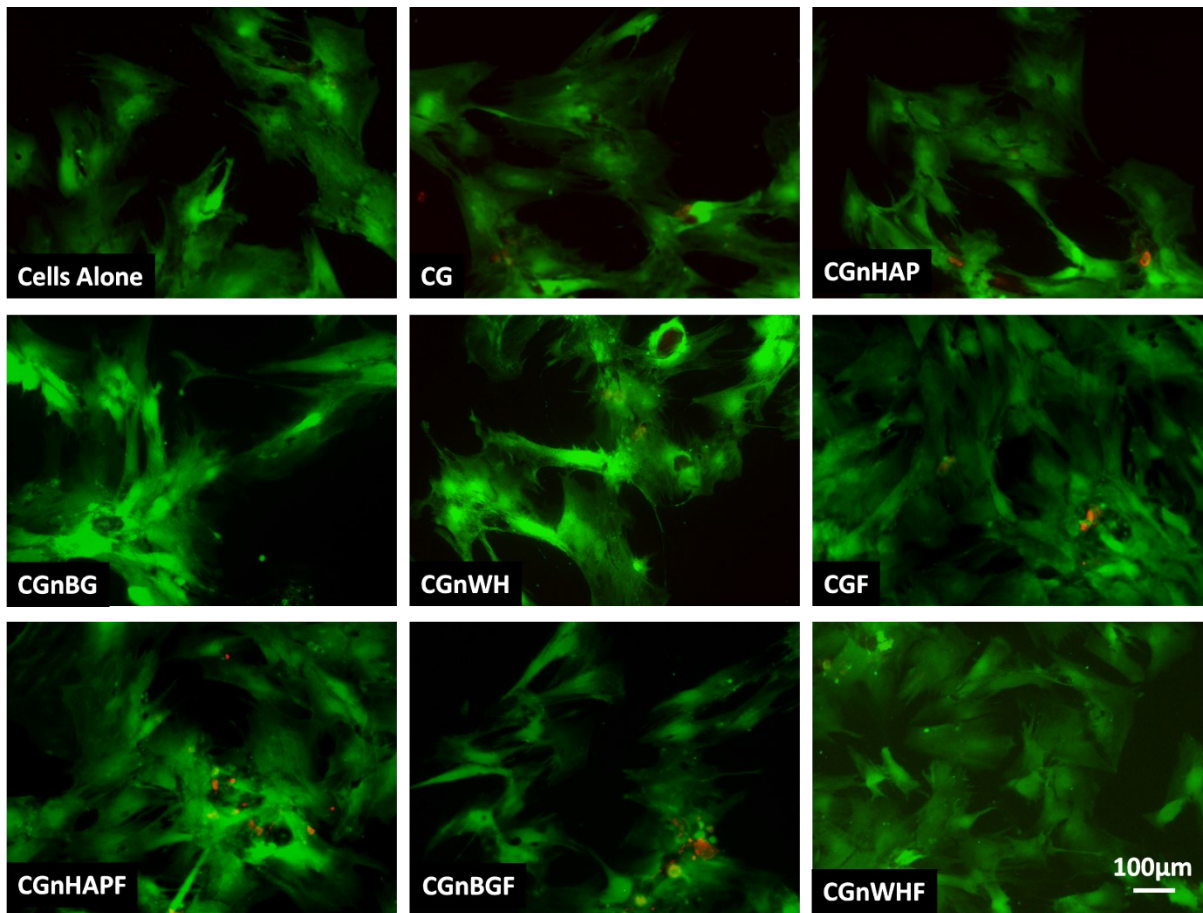

**Figure S2:** Live dead assay showing cell viability of hADSCs in the presence of prepared hydrogel after 48 hours.

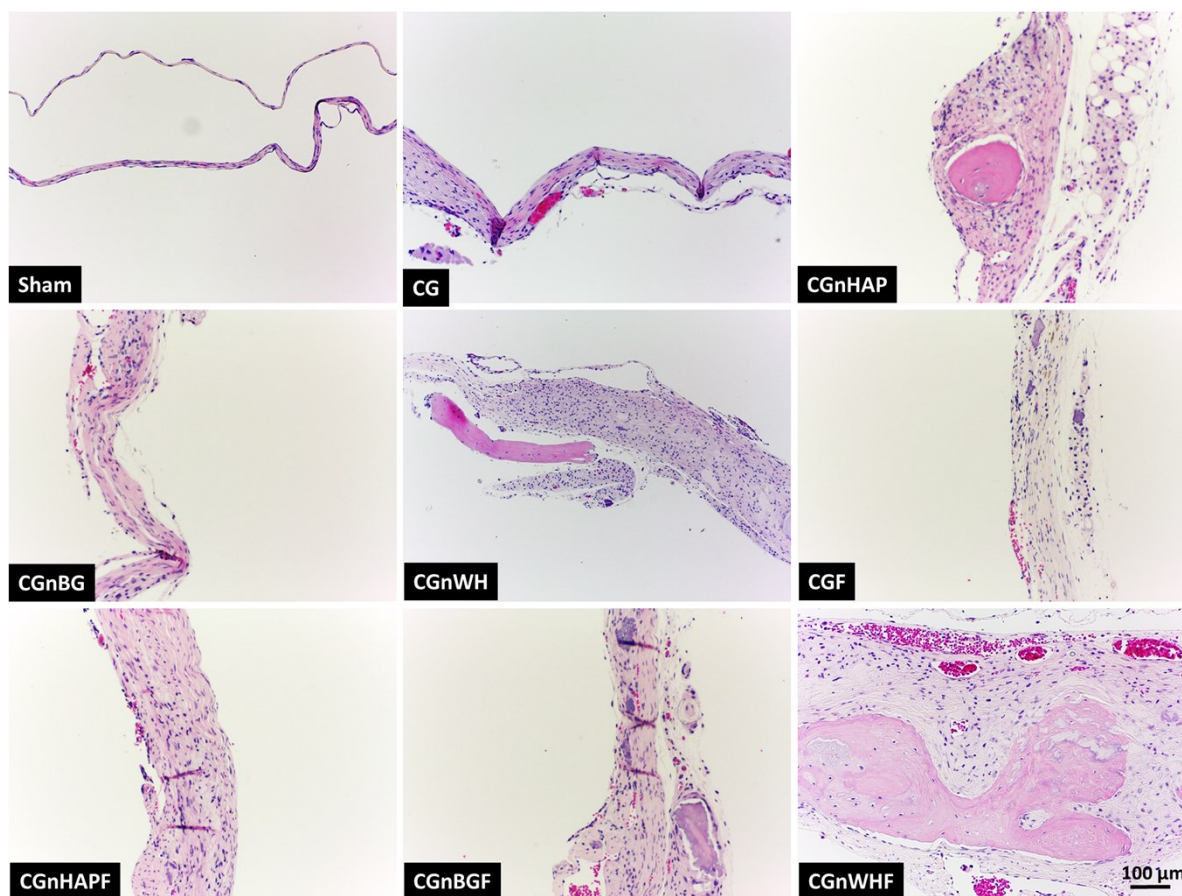

**Figure S3:** Magnified histological evaluation of tissues implanted with prepared hydrogels at 8 weeks by Hematoxylin & Eosin. Scale bar: 100 $\mu$ m.

## References

- 1 I. Kim, S. S. Lee, S. H. L. Kim, S. Bae, H. Lee and N. S. Hwang, *Macromol. Biosci.*, 2019, **19**, 1800460.
- 2 S. Kwon, S. S. Lee, A. Sivashanmugam, J. Kwon, S. H. L. Kim, M. Y. Noh, S. K. Kwon and R. Jayakumar, *Polymers*, 2018, **10**, 914.
